# Supplementary material for: Effect of the Colloidal Preparation Method for Supported Preformed Colloidal Au Nanoparticles for the Liquid Phase Oxidation of 1,6-Hexanediol to Adipic Acid
Source: MDPI journal article supplement (doi:10.3390/catal12020196), 2022-02-04
Supplement: s1 [file s1]

# Supplementary information

*Article*

## Effect of the Colloidal Preparation Method for Supported Preformed Colloidal Au Nanoparticles for the Liquid Phase Oxidation of 1,6-Hexanediol to Adipic Acid

Eleonora Monti <sup>1</sup>, Alessia Ventimiglia <sup>1</sup>, Carolina Alejandra Garcia Soto <sup>1</sup>, Francesca Martelli <sup>1</sup>, Elena Rodríguez-Aguado <sup>2</sup>, Juan Antonio Cecilia <sup>2</sup>, Achraf Sadier <sup>3</sup>, Francesca Ospitali <sup>1</sup>, Tommaso Tabanelli <sup>1</sup>, Stefania Albonetti <sup>1</sup>, Fabrizio Cavani <sup>1</sup>, Robert Wojcieszak <sup>3,\*</sup>, and Nikolaos Dimitratos <sup>1,\*</sup>

- <sup>1</sup> Dipartimento di Chimica Industriale “Toso Montanari”, Alma Mater Studiorum Università di Bologna, Viale Risorgimento 4, 40136 Bologna, Italy; eleonora.monti8@unibo.it (E.M.); alessia.ventimiglia3@unibo.it (A.V.); carolina.garcia-soto@lpp.polytechnique.fr (C.A.G.S.); francesca.m.martelli@gmail.com (F.M.); francesca.ospitali@unibo.it (F.O.); tommaso.tabanelli@unibo.it (T.T.); stefania.albonetti@unibo.it (S.A.); fabrizio.cavani@unibo.it (F.C.)
- <sup>2</sup> Departamento de Química Inorgánica, Cristalografía y Mineralogía (Unidad Asociada al ICP-CSIC), Facultad de Ciencias, Universidad de Málaga, Campus de Teatinos, 29071 Málaga, Spain; aguadoelena5@gmail.com (E.R.-A.); jacecilia@uma.es (J.A.C.)
- <sup>3</sup> Univ. Lille, CNRS, Centrale Lille, Univ. Artois, UMR 8181–UCCS–Unité de Catalyse et Chimie du Solide, F-59000 Lille, France; achraf.sadier@univ-lille.fr
- \* Correspondence: robert.wojcieszak@univ-lille.fr (R.W.); nikolaos.dimitratos@unibo.it (N.D.)

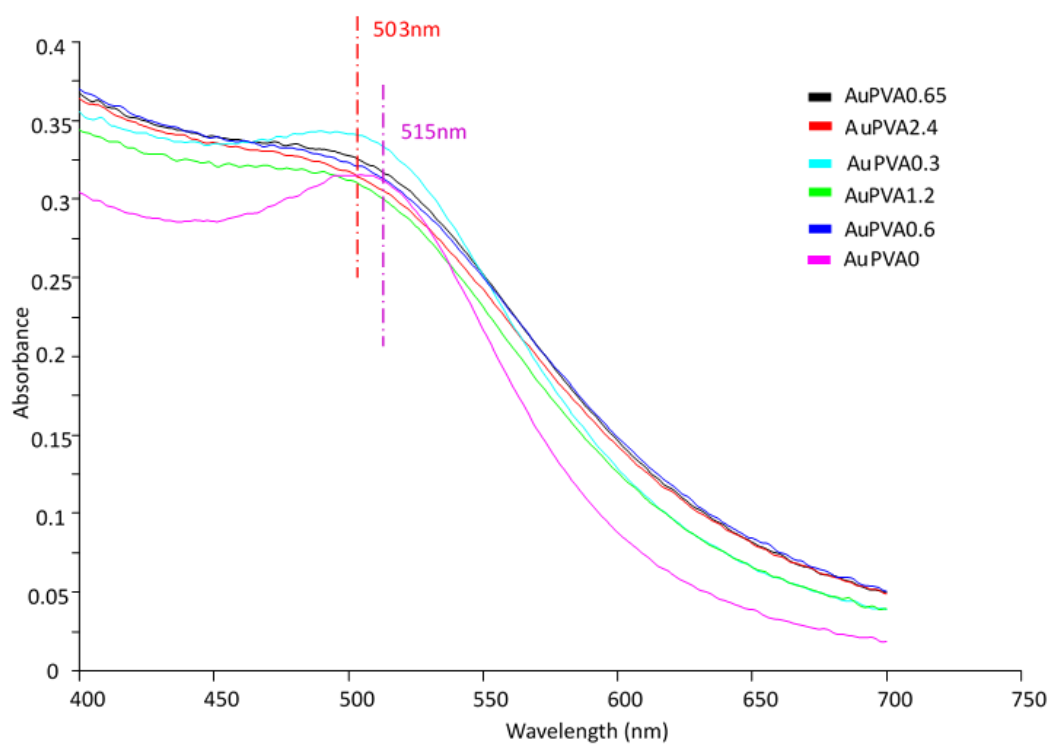

**Figure S1.** UV-Vis spectra of Au colloidal solutions with different PVA:Au weight ratio.

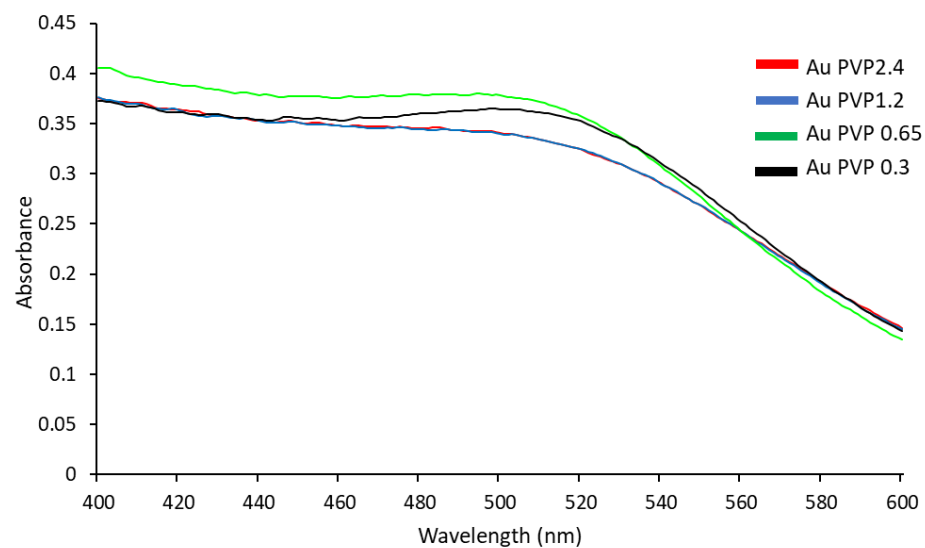

**Figure S2.** UV-Vis spectra for Au/AC PVP series after 25min from the addition of  $\text{NaBH}_4$ .

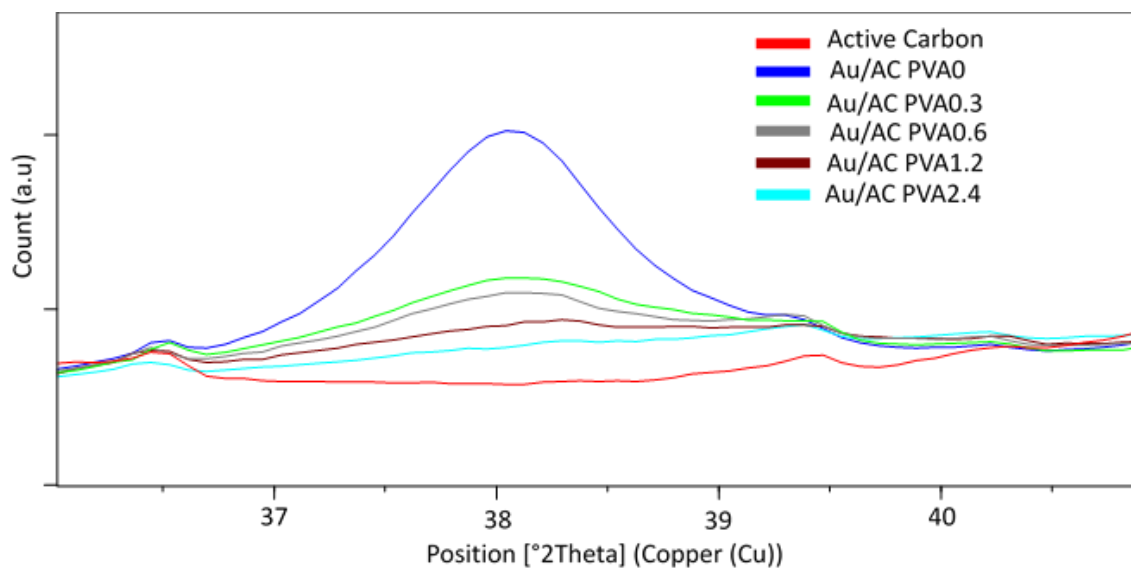

**Figure S3.** XRD patterns of activated carbon and Au/AC samples with different PVA:Au weight ratio.

**Table S1.** Mean crystallite size for Au/AC using PVA with different PVA:Au weight ratio.

| Catalyst            | Mean crystallite size (nm) |
|---------------------|----------------------------|
| <b>Au/AC PVA0</b>   | 6.4                        |
| <b>Au/AC PVA0.3</b> | 3.6                        |
| <b>Au/AC PVA0.6</b> | 3.1                        |
| <b>Au/AC PVA1.2</b> | 2.6                        |
| <b>Au/AC PVA2.4</b> | 2.2                        |

**Table S2.** Mean crystallite size for Au/AC using PVP with different PVP:Au weight ratio.

| Catalyst             | Mean crystallite size (nm) by XRD |
|----------------------|-----------------------------------|
| <b>Au/AC PVP0.3</b>  | 6.7                               |
| <b>Au/AC PVP0.65</b> | 6.4                               |
| <b>Au/AC PVP 1.2</b> | 8.2                               |
| <b>Au/AC PVP2.4</b>  | 8.1                               |

- **Au/AC (PVA/Au = 0.3)**

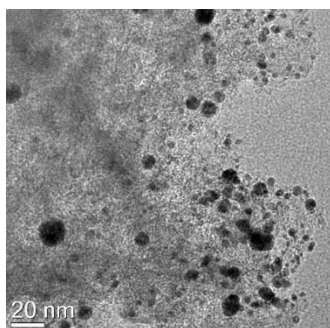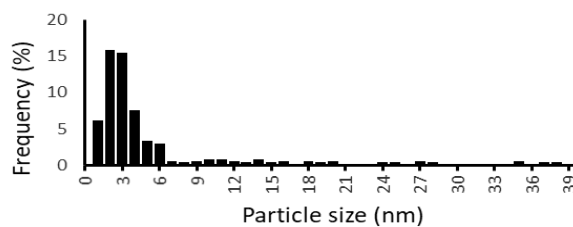

- **Au/AC (PVA/Au = 0.6)**

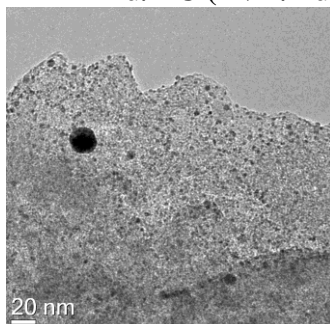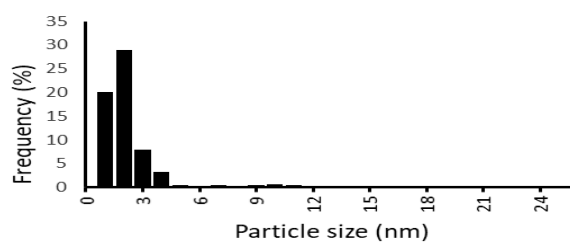

- **Au/AC (PVA/Au = 1.2)**

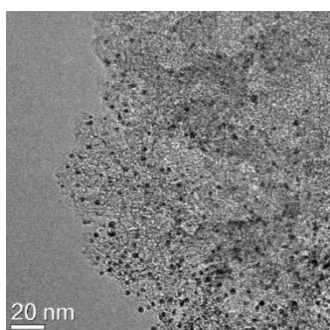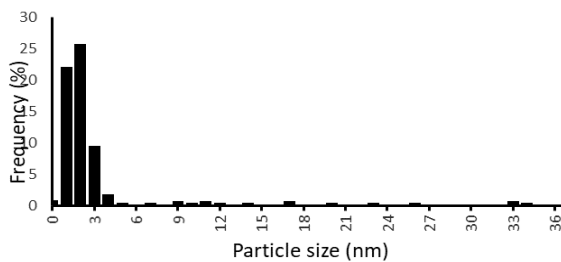

- **Au/AC (PVA/Au = 2.4)**

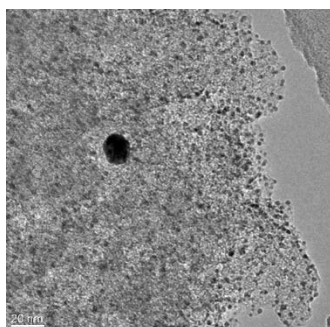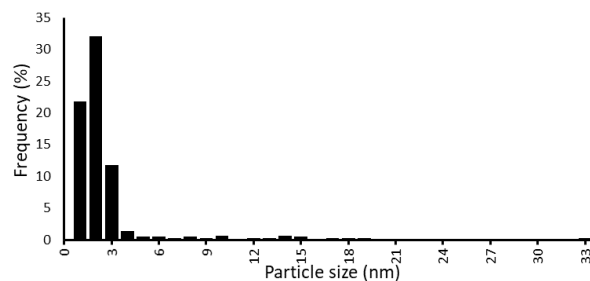

**Figure S4.** TEM images and particle size distributions of Au/AC synthesized using PVA with different PVA: Au weight ratio.

- **Au/AC (PVP/Au = 0.3)**

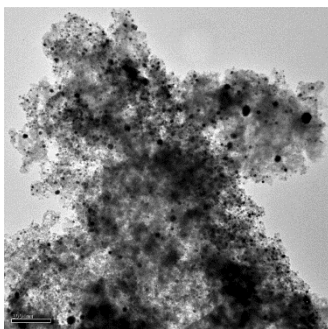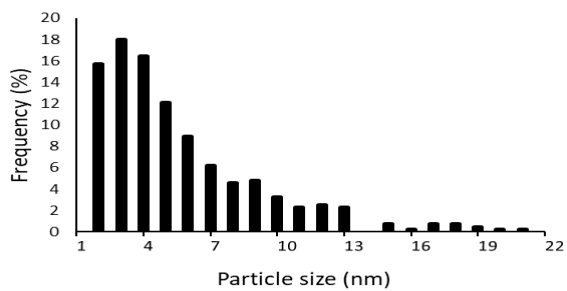

- **Au/AC (PVP/Au = 0.65)**

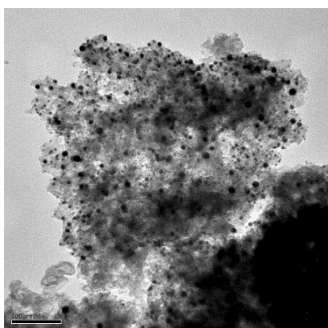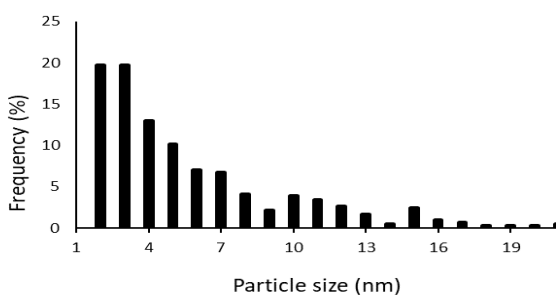

- **Au/AC (PVP/Au = 1.2)**

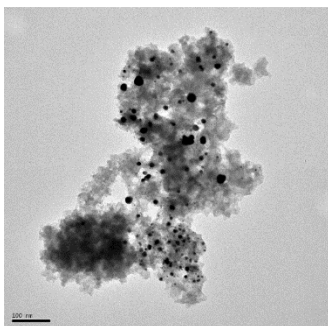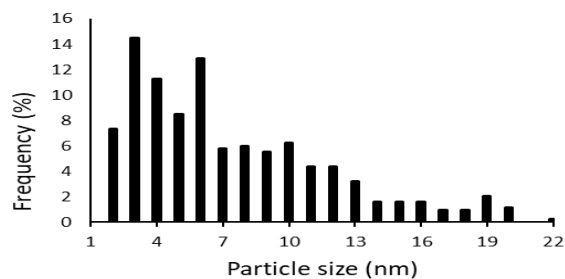

- **Au/AC (PVP/Au = 2.4)**

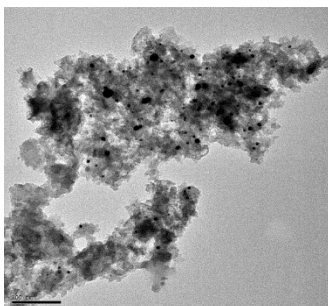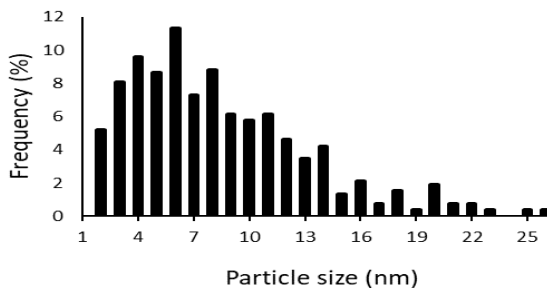

**Figure S5.** TEM images and particle size distributions of Au/AC synthesized using PVP with different PVA: Au weight ratio.

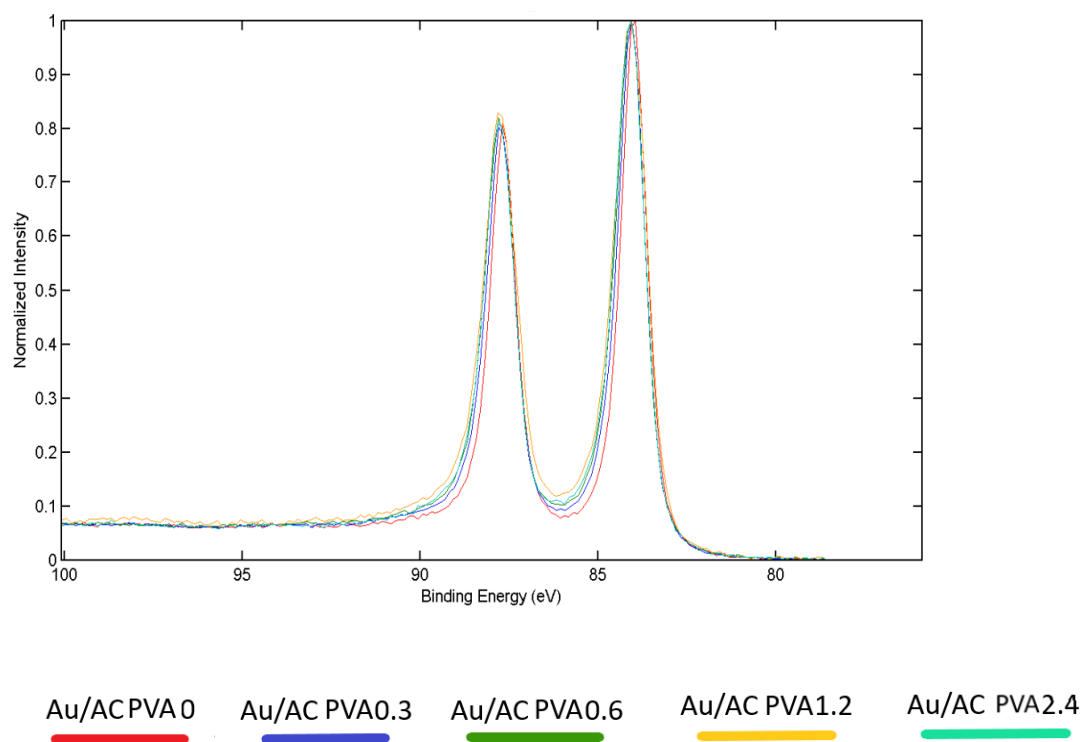

**Figure S6.** XPS spectra for Au/AC using PVA with different PVA: Au weight ratio.

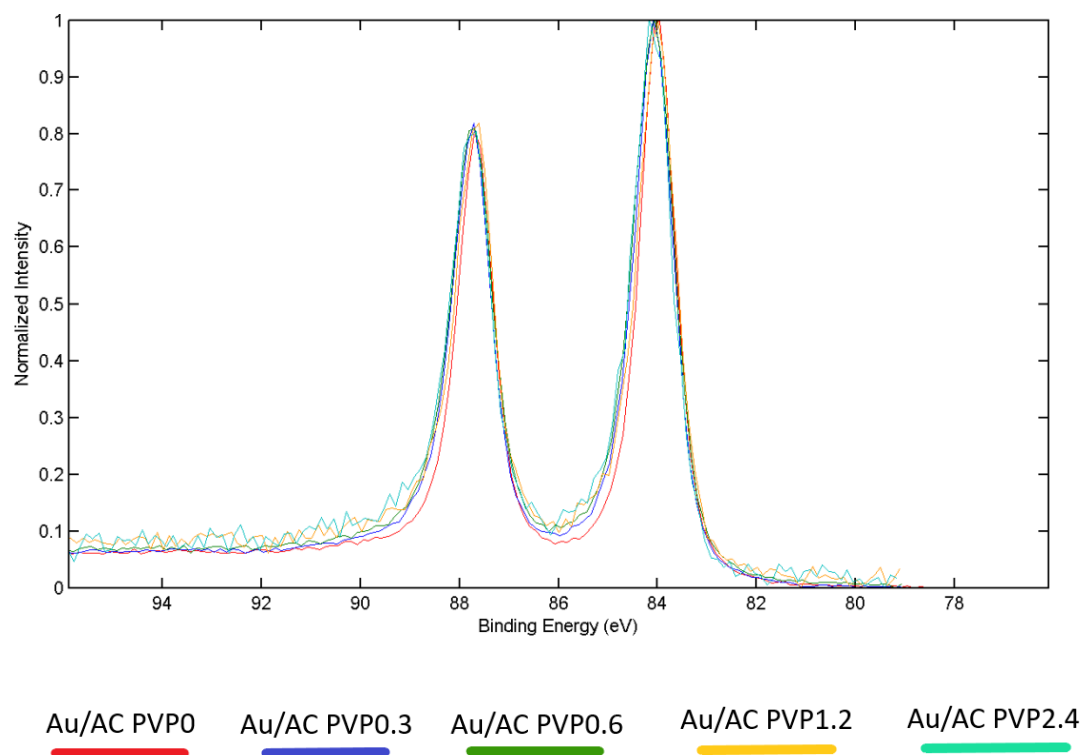

**Figure S7.** XPS spectra for Au/AC using PVP with different PVP: Au weight ratio (label “Au/AC PVP06” is the catalyst with PVP/Au=0.65 weight ratio).

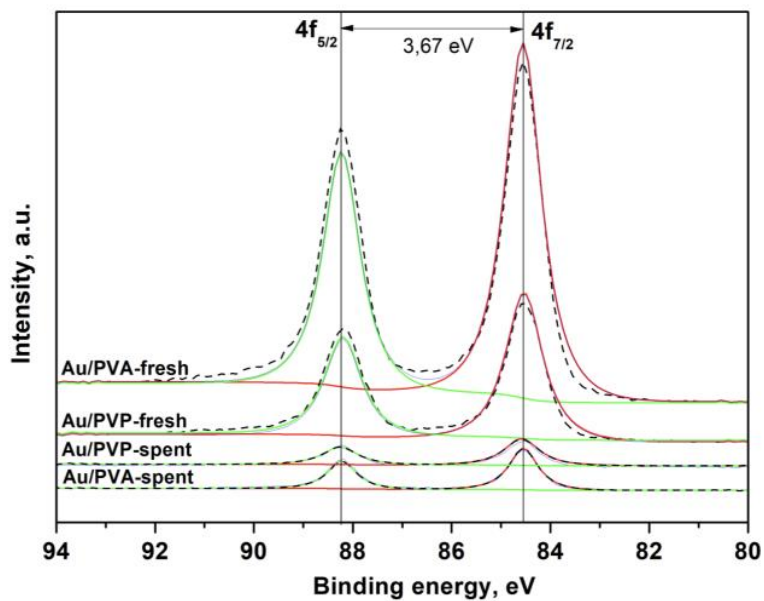

**Figure S8.** XPS spectra of the Au4f core levels of the fresh and spent C-supported Au-PVA and PVP catalysts.

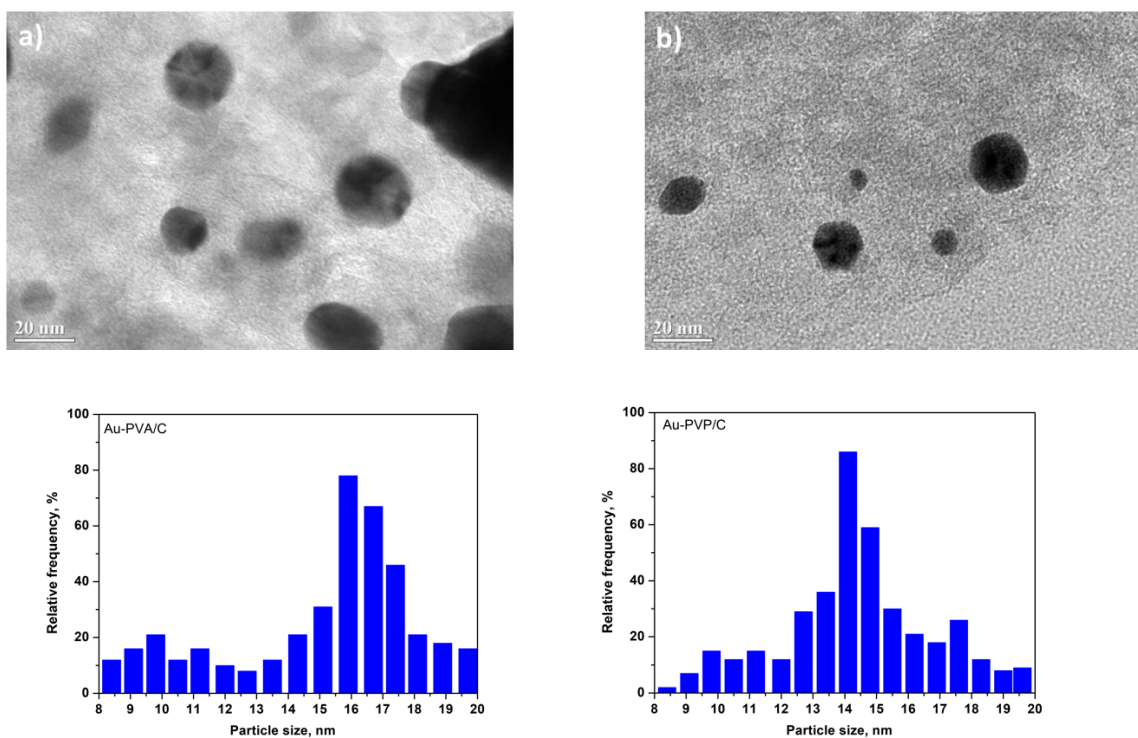

**Figure S9.** TEM images and particle size distributions of the spent catalysts a) Au-PVA/C and b) Au-PVP/C catalysts.

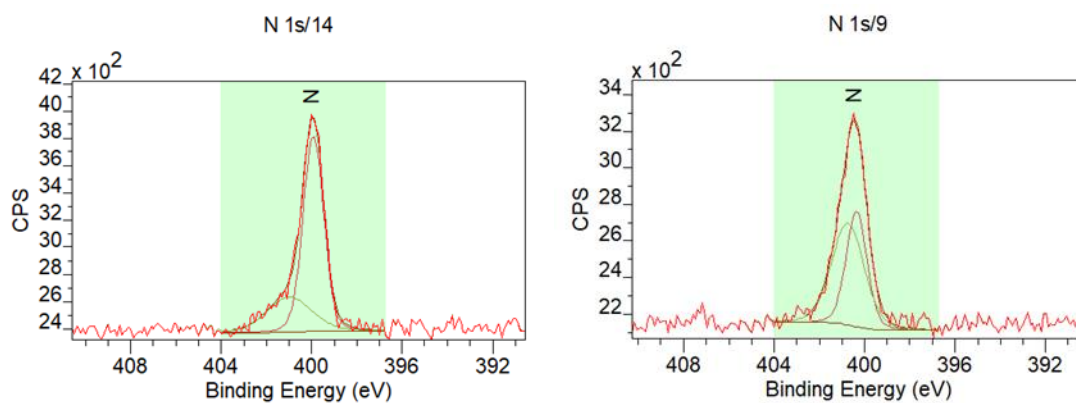

**Figure S10.** XPS spectra of the N1S core levels of the fresh and spent C-supported Au-PVP catalysts.
